# Supplementary material for: The Effect of Alternating High-Sucrose and Sucrose Free-Diets, and Intermittent One-Day Fasting on the Estrous Cycle and Sex Hormones in Female Rats
Source: MDPI journal article supplement (doi:10.3390/nu14204350), 2022-10-17
Supplement: s1 [file s1]

## Supplementary Materials:

**Table S1.** Component composition of diets.

| Component                             | Basic feed (BF) | Modified feed 1 (MF1) | Modified feed 2 (MF2) |
|---------------------------------------|-----------------|-----------------------|-----------------------|
| Wheat (g/100 g)                       | 36.4            | 6.01                  | 6.01                  |
| Corn grain (g/100 g)                  | 20.0            | 10.0                  | 10.0                  |
| Wheat bran (g/100 g)                  | 20.0            | 20.0                  | 20.0                  |
| Dry whey (g/100 g)                    | 3.0             | 3.0                   | 3.0                   |
| Fodder salt <sup>1</sup> (g/100 g)    | 0.3             | 0.3                   | 0.3                   |
| Soya-bean grain (g/100 g)             | 17.0            | 17.0                  | 17.0                  |
| Fodder chalk <sup>2</sup> (g/100 g)   | 1.5             | 1.5                   | 1.5                   |
| Phosphate 2-CA <sup>3</sup> (g/100 g) | 0.8             | 0.8                   | 0.8                   |
| Premix LRM <sup>4</sup> (g/100 g)     | 1.0             | 1.0                   | 1.0                   |
| Wheat flour (g/100 g)                 | 0.0             | 32.4                  | 24.4                  |
| Sucrose (g/100 g)                     | 0.0             | 8.0                   | 16.0                  |

<sup>1</sup>-Mainly NaCl; <sup>2</sup>- Mainly CaCO<sub>3</sub>; <sup>3</sup>- CaHPO<sub>4</sub>; <sup>4</sup>- Vitamin-mineral composition used in animals feeds content per kg: IU: A 1500000, vit. D3, 100000; mg: vit. E 8000; vit. K 300, vit. B1 1200, vit. B2 1200, vit. B6 1000, vit. B12 8, Se 100, Fe 16000, Mn 4500, Zn 6000, Cu 1300, I 100, Co 200.

**Table S2.** Chemical composition of diets.

| Component            | Basic feed (BF) | Modified feed 1 (MF1) | Modified feed 2 (MF2) |
|----------------------|-----------------|-----------------------|-----------------------|
| Total protein (%)    | 17.9 ±0.09      | 18.4 ±0.12            | 16.9 ±0.10            |
| % of diet energy     | 21.0            | 21.4                  | 19.1                  |
| Crude fat (%)        | 3.2 ±0.11       | 3.5 ±0.15             | 3.6 ±0.09             |
| % of diet energy     | 8.58            | 9.28                  | 9.05                  |
| Carbohydrates (%)    |                 |                       |                       |
| total                | 63.1 ±0.55      | 63.9 ±0.19            | 65.8 ±0.48            |
| fiber                | 6.0 ±0.15       | 4.4 ±0.21             | 4.4 ±0.13             |
| digested             | 57.1 ±0.50      | 59.5 ±0.61            | 61.5 ±0.44            |
| % of diet energy     | 70.4            | 69.3                  | 71.8                  |
| Dry matter (%)       | 90.8 ±0.20      | 92.4 ±0.16            | 92.9 ±0.11            |
| Total ash (%)        | 6.5 ±0.12       | 6.6 ±0.09             | 6.6 ±0.18             |
| Metabolizable energy |                 |                       |                       |
| (kcal/100 g)         | 341             | 352                   | 354                   |
| (kJ/100 g)           | 1425            | 1471                  | 1484                  |

**Table S3.** The course of the estrous cycle in females from the control group (CG).

| Day<br>Animal | 1 | 2 | 3 | 4 | 5 | 6 | 7 | 8 | 9 | 10 | 11 | 12 | 13 | 14 | 15 | 16 | 17 | 18 | 19 | 20 | 21 | Estrus days |
|---------------|---|---|---|---|---|---|---|---|---|----|----|----|----|----|----|----|----|----|----|----|----|-------------|
| 1 CG          | D | D | E | E | D | D | E | E | D | D  | P  | E  | D  | D  | D  | E  | E  | D  | D  | P  | E  | 8           |
| 2 CG          | D | D | P | E | E | D | D | D | E | E  | D  | D  | D  | E  | E  | D  | D  | P  | E  | E  | D  | 8           |
| 3 CG          | M | D | D | P | E | E | D | D | D | E  | E  | D  | D  | P  | E  | E  | E  | D  | D  | P  | E  | 8           |
| 4 CG          | D | D | D | E | M | D | D | D | E | E  | D  | D  | D  | E  | D  | D  | P  | E  | D  | D  | D  | 5           |
| 5 CG          | D | D | P | E | D | D | D | E | D | D  | E  | E  | D  | D  | D  | E  | E  | D  | D  | D  | E  | 6           |
| 6 CG          | M | D | D | E | E | D | D | D | E | E  | D  | D  | P  | E  | E  | D  | D  | D  | E  | E  | M  | 8           |
| 7 CG          | D | D | E | E | D | D | D | E | E | D  | D  | P  | E  | E  | D  | D  | D  | E  | E  | M  | D  | 8           |
| 8 CG          | M | D | D | E | E | E | D | D | P | E  | E  | M  | D  | D  | E  | E  | E  | D  | D  | E  | E  | 9           |
| 9 CG          | M | D | D | E | E | D | D | D | E | E  | D  | D  | E  | E  | M  | D  | D  | E  | E  | E  | D  | 9           |
| 10 CG         | M | D | D | E | E | D | D | D | E | E  | D  | D  | E  | E  | D  | D  | P  | E  | E  | D  | D  | 8           |

CG – Control group; D – Diestrus; P – Proestrus; E – Estrus; M – Metestrus

**Table S4.** The course of the estrous cycle in females from the sugar balanced group (SBG).

| Day<br>Animal | 1 | 2 | 3 | 4 | 5 | 6 | 7 | 8 | 9 | 10 | 11 | 12 | 13 | 14 | 15 | 16 | 17 | 18 | 19 | 20 | 21 | Estrus days |
|---------------|---|---|---|---|---|---|---|---|---|----|----|----|----|----|----|----|----|----|----|----|----|-------------|
| 1 SBG         | M | D | E | E | E | D | D | D | E | E  | D  | D  | D  | E  | E  | M  | D  | D  | D  | P  | E  | 8           |
| 2 SBG         | D | D | P | E | E | D | D | D | D | P  | E  | D  | D  | D  | E  | E  | D  | D  | D  | P  | E  | 6           |
| 3 SBG         | M | D | E | E | D | D | D | E | M | D  | D  | D  | E  | E  | D  | D  | D  | E  | E  | D  | D  | 7           |
| 4 SBG         | D | D | E | E | E | D | D | E | E | D  | D  | D  | P  | E  | D  | D  | D  | E  | E  | M  | D  | 8           |
| 5 SBG         | M | D | D | D | E | E | D | D | D | E  | D  | D  | D  | P  | E  | M  | D  | D  | D  | E  | E  | 6           |
| 6 SBG         | M | D | P | E | D | E | D | D | E | D  | E  | M  | D  | D  | P  | E  | D  | D  | E  | D  | P  | 6           |
| 7 SBG         | M | D | P | E | D | D | E | D | D | P  | E  | D  | D  | E  | D  | D  | P  | E  | D  | D  | E  | 6           |
| 8 SBG         | D | D | E | M | D | D | E | D | D | D  | E  | D  | D  | P  | E  | E  | D  | D  | D  | E  | M  | 6           |
| 9 SBG         | M | D | E | M | D | D | E | D | D | E  | M  | D  | D  | E  | M  | D  | D  | E  | D  | D  | E  | 6           |
| 10 SBG        | D | D | D | E | D | E | D | D | E | E  | D  | D  | E  | D  | D  | P  | E  | M  | D  | D  | E  | 7           |

SBG – Sugar balanced group; D – Diestrus; P – Proestrus; E – Estrus; M – Metestrus

**Table S5.** The course of the estrous cycle in females from the high sugar group (HSG).

| Day<br>Animal | 1 | 2 | 3 | 4 | 5 | 6 | 7 | 8 | 9 | 10 | 11 | 12 | 13 | 14 | 15 | 16 | 17 | 18 | 19 | 20 | 21 | Estrus days |
|---------------|---|---|---|---|---|---|---|---|---|----|----|----|----|----|----|----|----|----|----|----|----|-------------|
| 1 HSG         | D | D | E | D | D | D | P | E | D | D  | E  | M  | D  | D  | D  | D  | E  | D  | D  | D  | E  | 5           |
| 2 HSG         | D | D | E | M | P | E | D | D | E | M  | D  | D  | E  | M  | P  | D  | D  | E  | M  | E  | E  | 7           |
| 3 HSG         | M | D | E | M | D | D | D | E | D | D  | D  | P  | E  | D  | D  | D  | E  | M  | D  | D  | P  | 4           |
| 4 HSG         | E | E | E | D | D | P | E | D | E | M  | D  | D  | P  | M  | D  | D  | D  | E  | D  | D  | D  | 6           |
| 5 HSG         | M | E | E | M | D | D | P | E | M | D  | D  | D  | E  | E  | D  | D  | D  | P  | M  | D  | D  | 5           |
| 6 HSG         | M | D | D | E | E | D | D | D | E | E  | D  | D  | D  | P  | E  | D  | D  | D  | E  | E  | M  | 7           |
| 7 HSG         | D | E | P | D | D | P | E | D | D | D  | M  | D  | D  | D  | P  | E  | M  | D  | D  | D  | E  | 4           |
| 8 HSG         | M | E | P | E | E | D | E | D | P | E  | D  | D  | M  | D  | D  | E  | M  | M  | D  | D  | P  | 6           |
| 9 HSG         | D | E | E | E | D | D | D | D | P | M  | E  | D  | D  | P  | P  | M  | D  | D  | D  | E  | E  | 6           |
| 10 HSG        | E | D | E | D | D | D | P | E | M | D  | D  | D  | E  | M  | D  | D  | D  | P  | E  | E  | E  | 7           |

HSG – High sugar group; D – Diestrus; P – Proestrus; E – Estrus; M – Metestrus

**Table S6.** The course of the estrous cycle in females from the alternately fed group (AFG).

| Day<br>Animal | 1 | 2 | 3 | 4 | 5 | 6 | 7 | 8 | 9 | 10 | 11 | 12 | 13 | 14 | 15 | 16 | 17 | 18 | 19 | 20 | 21 | Estrus days |
|---------------|---|---|---|---|---|---|---|---|---|----|----|----|----|----|----|----|----|----|----|----|----|-------------|
| 1 AFG         | D | D | E | E | D | D | D | P | E | D  | D  | E  | M  | D  | D  | D  | E  | D  | D  | P  | E  | 6           |
| 2 AFG         | D | D | D | P | E | D | D | D | D | M  | D  | D  | D  | E  | E  | D  | D  | P  | E  | E  | M  | 5           |
| 3 AFG         | M | D | D | E | D | E | D | D | P | E  | M  | D  | D  | E  | E  | D  | D  | D  | E  | M  | D  | 6           |
| 4 AFG         | D | D | D | E | E | D | D | P | E | D  | D  | D  | E  | E  | D  | D  | D  | E  | M  | D  | D  | 6           |
| 5 AFG         | D | E | M | D | D | E | D | D | E | D  | D  | D  | E  | M  | D  | D  | P  | E  | D  | D  | E  | 6           |
| 6 AFG         | D | D | D | P | E | D | D | D | E | M  | D  | D  | D  | D  | E  | D  | D  | P  | E  | M  | D  | 4           |
| 7 AFG         | M | D | E | D | D | P | E | D | D | D  | E  | M  | D  | D  | D  | E  | E  | D  | D  | D  | E  | 6           |
| 8 AFG         | M | D | E | D | E | D | D | P | E | D  | D  | E  | M  | D  | D  | P  | E  | D  | D  | D  | E  | 6           |
| 9 AFG         | E | D | D | E | E | E | D | D | P | M  | D  | D  | D  | E  | D  | D  | D  | P  | E  | D  | D  | 6           |
| 10 AFG        | P | E | M | E | D | D | D | P | M | D  | D  | D  | E  | E  | D  | D  | D  | P  | E  | M  | D  | 5           |

AFG – Alternately fed group; D – Diestrus; P – Proestrus; E – Estrus; M – Metestrus

**Table S7.** The course of the estrous cycle in females from the periodically starved group (PSG).

| Day<br>Animal | 1 | 2 | 3 | 4 | 5 | 6 | 7 | 8 | 9 | 10 | 11 | 12 | 13 | 14 | 15 | 16 | 17 | 18 | 19 | 20 | 21 | Estrus<br>days |
|---------------|---|---|---|---|---|---|---|---|---|----|----|----|----|----|----|----|----|----|----|----|----|----------------|
| 1 PSG         | D | D | D | E | E | D | D | P | E | M  | D  | D  | D  | E  | D  | D  | D  | E  | M  | D  | D  | 5              |
| 2 PSG         | D | P | E | D | D | D | P | E | M | D  | D  | D  | E  | D  | D  | D  | M  | D  | D  | D  | E  | 4              |
| 3 PSG         | M | P | D | D | P | E | D | D | E | M  | D  | D  | D  | E  | E  | M  | D  | D  | M  | D  | P  | 4              |
| 4 PSG         | D | D | D | E | E | D | D | D | M | D  | D  | D  | E  | D  | D  | D  | P  | E  | M  | D  | D  | 4              |
| 5 PSG         | M | D | D | D | P | D | D | P | E | D  | D  | D  | E  | M  | D  | D  | D  | E  | D  | D  | P  | 3              |
| 6 PSG         | D | M | D | D | D | D | E | D | D | D  | P  | E  | M  | D  | D  | E  | D  | D  | D  | P  | E  | 4              |
| 7 PSG         | M | D | D | D | P | E | D | D | D | E  | M  | D  | D  | P  | M  | D  | D  | E  | E  | D  | D  | 4              |
| 8 PSG         | D | E | D | P | E | D | D | E | D | D  | P  | E  | D  | D  | D  | E  | M  | D  | D  | E  | M  | 6              |
| 9 PSG         | D | P | E | E | D | D | D | P | M | D  | E  | E  | M  | P  | E  | D  | D  | D  | D  | E  | M  | 6              |
| 10 PSG        | M | E | E | D | P | D | D | D | E | M  | D  | P  | M  | D  | D  | D  | E  | D  | D  | D  | P  | 4              |

PSG – Periodically starved group; D – Diestrus; P – Proestrus; E – Estrus; M – Metestrus

**Table S8.** P-values for the statistics of hormone concentration determinations.

| Hormone     | P-value                                                                                                                                                                                                                           |
|-------------|-----------------------------------------------------------------------------------------------------------------------------------------------------------------------------------------------------------------------------------|
| <b>LH</b>   | CG <i>vs</i> HSG 0.001; CG <i>vs</i> AFG 0.002; CG <i>vs</i> PSG 0.0009<br>SBG <i>vs</i> HSG 0.001; SBG <i>vs</i> AFG 0.001; SBG <i>vs</i> PSG 0.0007<br>HSG <i>vs</i> PSG 0.036<br>AFG <i>vs</i> PSG 0.034                       |
| <b>FSH</b>  | CG <i>vs</i> PSG 0.029<br>SBG <i>vs</i> PSG 0.030<br>HSG <i>vs</i> PSG 0.029<br>AFG <i>vs</i> PSG 0.029                                                                                                                           |
| <b>E2</b>   | CG <i>vs</i> SBG 0.0001; CG <i>vs</i> HSG 0.0002; CG <i>vs</i> AFG 0.0002; CG <i>vs</i> PSG 0.0001<br>SBG <i>vs</i> PSG 0.049<br>HSG <i>vs</i> PSG 0.048<br>AFG <i>vs</i> PSG 0.048                                               |
| <b>Pg</b>   | CG <i>vs</i> SBG 0.048; CG <i>vs</i> HSG 0.001; CG <i>vs</i> AFG 0.002; CG <i>vs</i> PSG 0.001<br>SBG <i>vs</i> HSG 0.002; SBG <i>vs</i> AFG 0.003; SBG <i>vs</i> PSG 0.001<br>HSG <i>vs</i> PSG 0.049<br>AFG <i>vs</i> PSG 0.049 |
| <b>T</b>    | CG <i>vs</i> AFG 0.049<br>SBG <i>vs</i> AFG 0.047<br>HSG <i>vs</i> AFG 0.048<br>AFG <i>vs</i> PSG 0.047                                                                                                                           |
| <b>SHGB</b> | CG <i>vs</i> HSG 0.043; CG <i>vs</i> AFG 0.045<br>SBG <i>vs</i> HSG 0.039; SBG <i>vs</i> AFG 0.041<br>HSG <i>vs</i> PSG 0.048<br>AFG <i>vs</i> PSG 0.049                                                                          |

CG – Control group; SBG – Sugar balanced group; HSG – High sugar group; AFG – Alternately fed group; PSG – Periodically starved group. LH - luteinizing hormone; FSH - follicle stimulating hormone; E2 – estradiol; Pg – progesterone; T – testosterone; SHGB - sex hormone-binding globulin.
